# Supplementary material for: The Use of Premixed Calcium Silicate Bioceramic Sealer with Warm Carrier-Based Technique: A 2-Year Study for Patients Treated in a Master Program
Source: MDPI journal article supplement (doi:10.3390/jfb14030164), 2023-03-18
Supplement: s1 [file s1]

# **The Use of Premixed Calcium Silicate Bioceramic Sealer with Warm Carrier-Based Technique: A 2-Year Study for Patients Treated in A Master Program**

**Fausto Zamparini <sup>1,2</sup>, Andrea Spinelli <sup>1</sup>, Filippo Cardinali <sup>3</sup>, Pietro Ausiello <sup>4</sup>, Maria Giovanna Gandolfi <sup>2</sup> and Carlo Prati <sup>1,5,\*</sup>**

<sup>1</sup> Endodontic Clinical Section, Dental School, Department of Biomedical and Neuromotor Sciences, University of Bologna, Bologna, 40125, Italy

<sup>2</sup> Laboratory of Green Biomaterials and Oral Pathology, Dental School, Department of Biomedical and Neuromotor Sciences, University of Bologna, Bologna, 40125, Italy

<sup>3</sup> Private Practice, Ancona, 60123, Italy; filocardinali@gmail.com

<sup>4</sup> School of Dentistry, University of Naples Federico II, Naples, 80131, Italy

<sup>5</sup> Dean Master in Endodontics, Dental School, University of Bologna, Via San Vitale 59, 40125 Bologna, Italy

\* Correspondence: carlo.prati@unibo.it

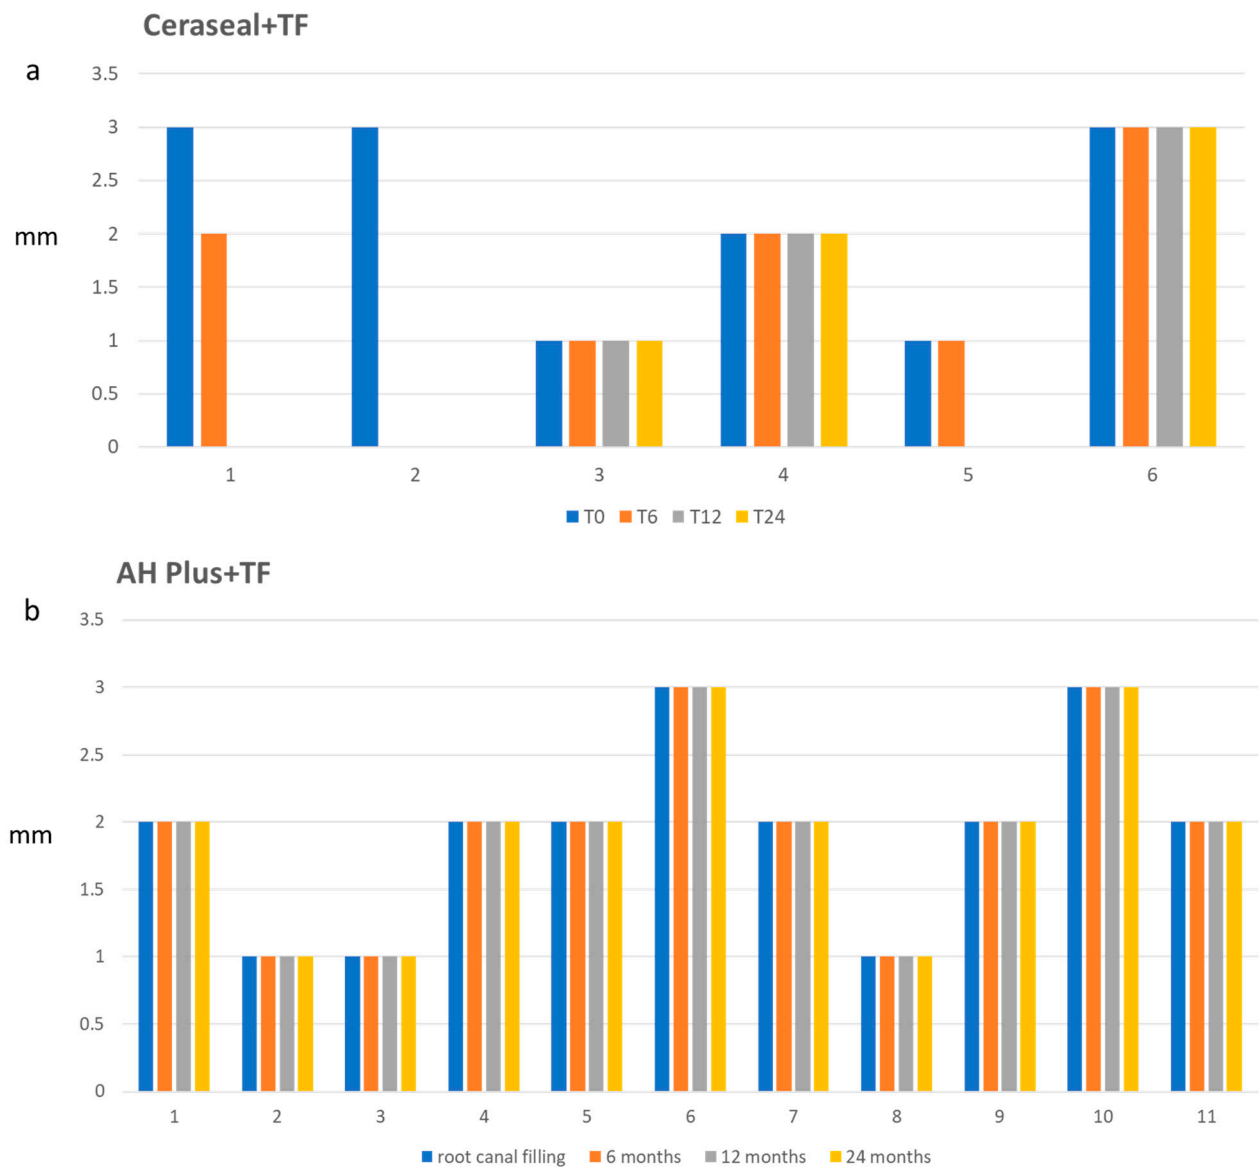

**Figure S1.** Graphs reporting the cases where sealer apical extrusion occurred. Periapical radiographs during the follow-up at 6, 12 and 24 months revealed the complete radiographical resorption of 3 extrusions in Ceraseal-TF group, one at 6 months and 2 at 12 months respectively. Differently, AH Plus-TF extrusions were stable along all the 24 months follow-up.

**Table S1:** Quantification of radiographic apically extruded sealer in relation to PAI. Ceraseal +TF group displayed radiographic resorption of the sealer, while AH Plus+TF displayed no modification of extruded sealer.

|         | Ceraseal-TF |     |         |     | AH Plus-TF |     |         |     |
|---------|-------------|-----|---------|-----|------------|-----|---------|-----|
|         | PAI 1-2     |     | PAI 3-5 |     | PAI 1-2    |     | PAI 3-5 |     |
|         | T0          | T24 | T0      | T24 | T0         | T24 | T0      | T24 |
| 0mm     | 18          | 19  | 21      | 23  | 14         | 14  | 19      | 19  |
| 0.1-1mm | 1           | 0   | 1       | 1   | 1          | 1   | 2       | 2   |
| 1.1-3mm | 0           | 0   | 1       | 1   | 4          | 4   | 2       | 2   |
| ≥ 3mm   | 0           | 0   | 3       | 1   | 2          | 2   | 0       | 0   |
